# Supplementary material for: Differentially Expressed Genes Shared by Two Distinct Cytoplasmic Male Sterility (CMS) Types of Silene vulgaris Suggest the Importance of Oxidative Stress in Pollen Abortion
Source: MDPI journal article supplement (doi:10.3390/cells9122700), 2020-12-16
Supplement: s1 [file s1]

## BUSCO Assessment Results

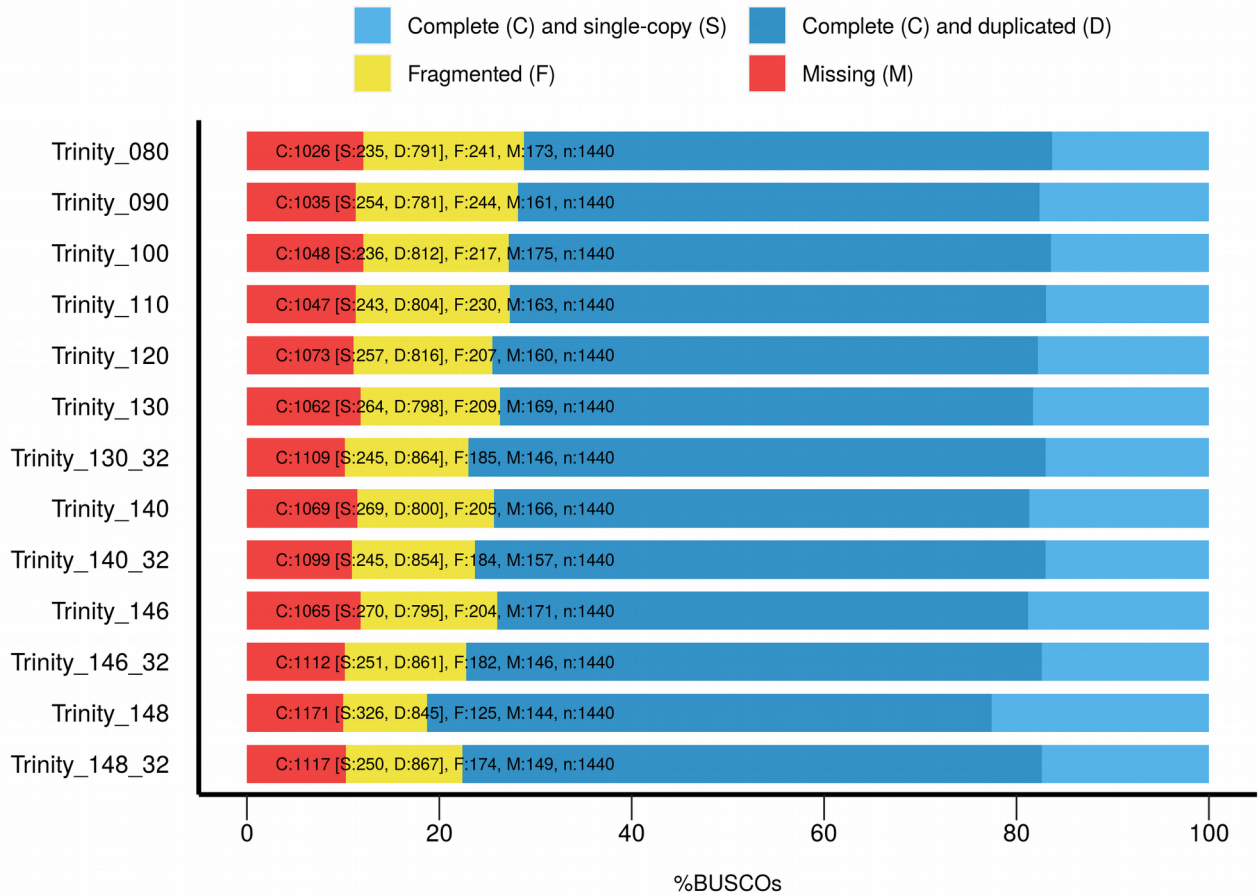

| Assembly       | Completeness | Contiguity | N50  | detonate        |
|----------------|--------------|------------|------|-----------------|
| Trinity_080    | 0.905        | 0.799      | 2444 | -43735258926.12 |
| Trinity_090    | 0.904        | 0.798      | 2437 | -43210856665.72 |
| Trinity_100    | 0.904        | 0.799      | 2460 | -40618274889.78 |
| Trinity_110    | 0.905        | 0.8        | 2461 | -37405947453.29 |
| Trinity_120    | 0.905        | 0.805      | 2469 | -33027899925.10 |
| Trinity_130    | 0.901        | 0.804      | 2495 | -28546814333.29 |
| Trinity_130_32 | 0.904        | 0.824      | 2484 | -43177227963.47 |
| Trinity_140    | 0.904        | 0.807      | 2513 | -25854357405.17 |
| Trinity_140_32 | 0.906        | 0.822      | 2520 | -40251315557.72 |
| Trinity_146    | 0.9          | 0.811      | 2539 | -25058784870.15 |
| Trinity_146_32 | 0.905        | 0.827      | 2528 | -39167557352.20 |
| Trinity_148    | 0.906        | 0.855      | 2472 | -23210895164.57 |
| Trinity_148_32 | 0.907        | 0.831      | 2542 | -36424989540.70 |

**Supplementary Figure 1.** The comparison of the assemblies made of various minimum length of trimmed reads of the KRA dataset.

## BUSCO Assessment Results

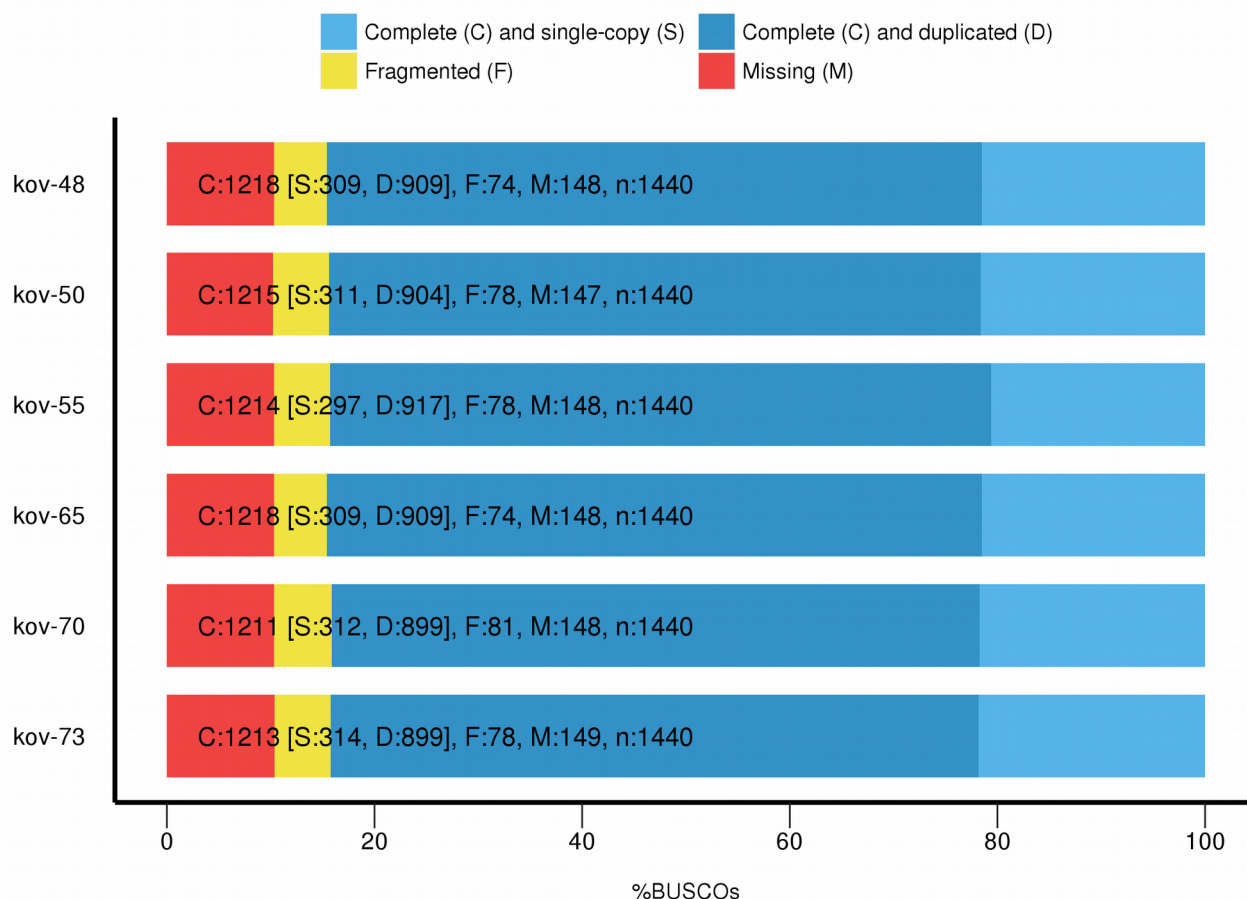

| Assembly      | Completeness | Contiguity | N50  | detonate     |
|---------------|--------------|------------|------|--------------|
| Trinity_kov48 | 0.91         | 0.869      | 1284 | -24269497757 |
| Trinity_kov50 | 0.91         | 0.866      | 1278 | -24215891686 |
| Trinity_kov55 | 0.91         | 0.868      | 1290 | -23938592782 |
| Trinity_kov60 | 0.91         | 0.867      | 1281 | -23627447642 |
| Trinity_kov65 | 0.909        | 0.868      | 1280 | -23349399191 |
| Trinity_kov70 | 0.908        | 0.865      | 1285 | -22536912895 |
| Trinity_kov73 | 0.908        | 0.867      | 1282 | -20677574542 |

**Supplementary Figure 2.** The comparison of the assemblies made of various minimum length of trimmed reads of the KOV dataset.

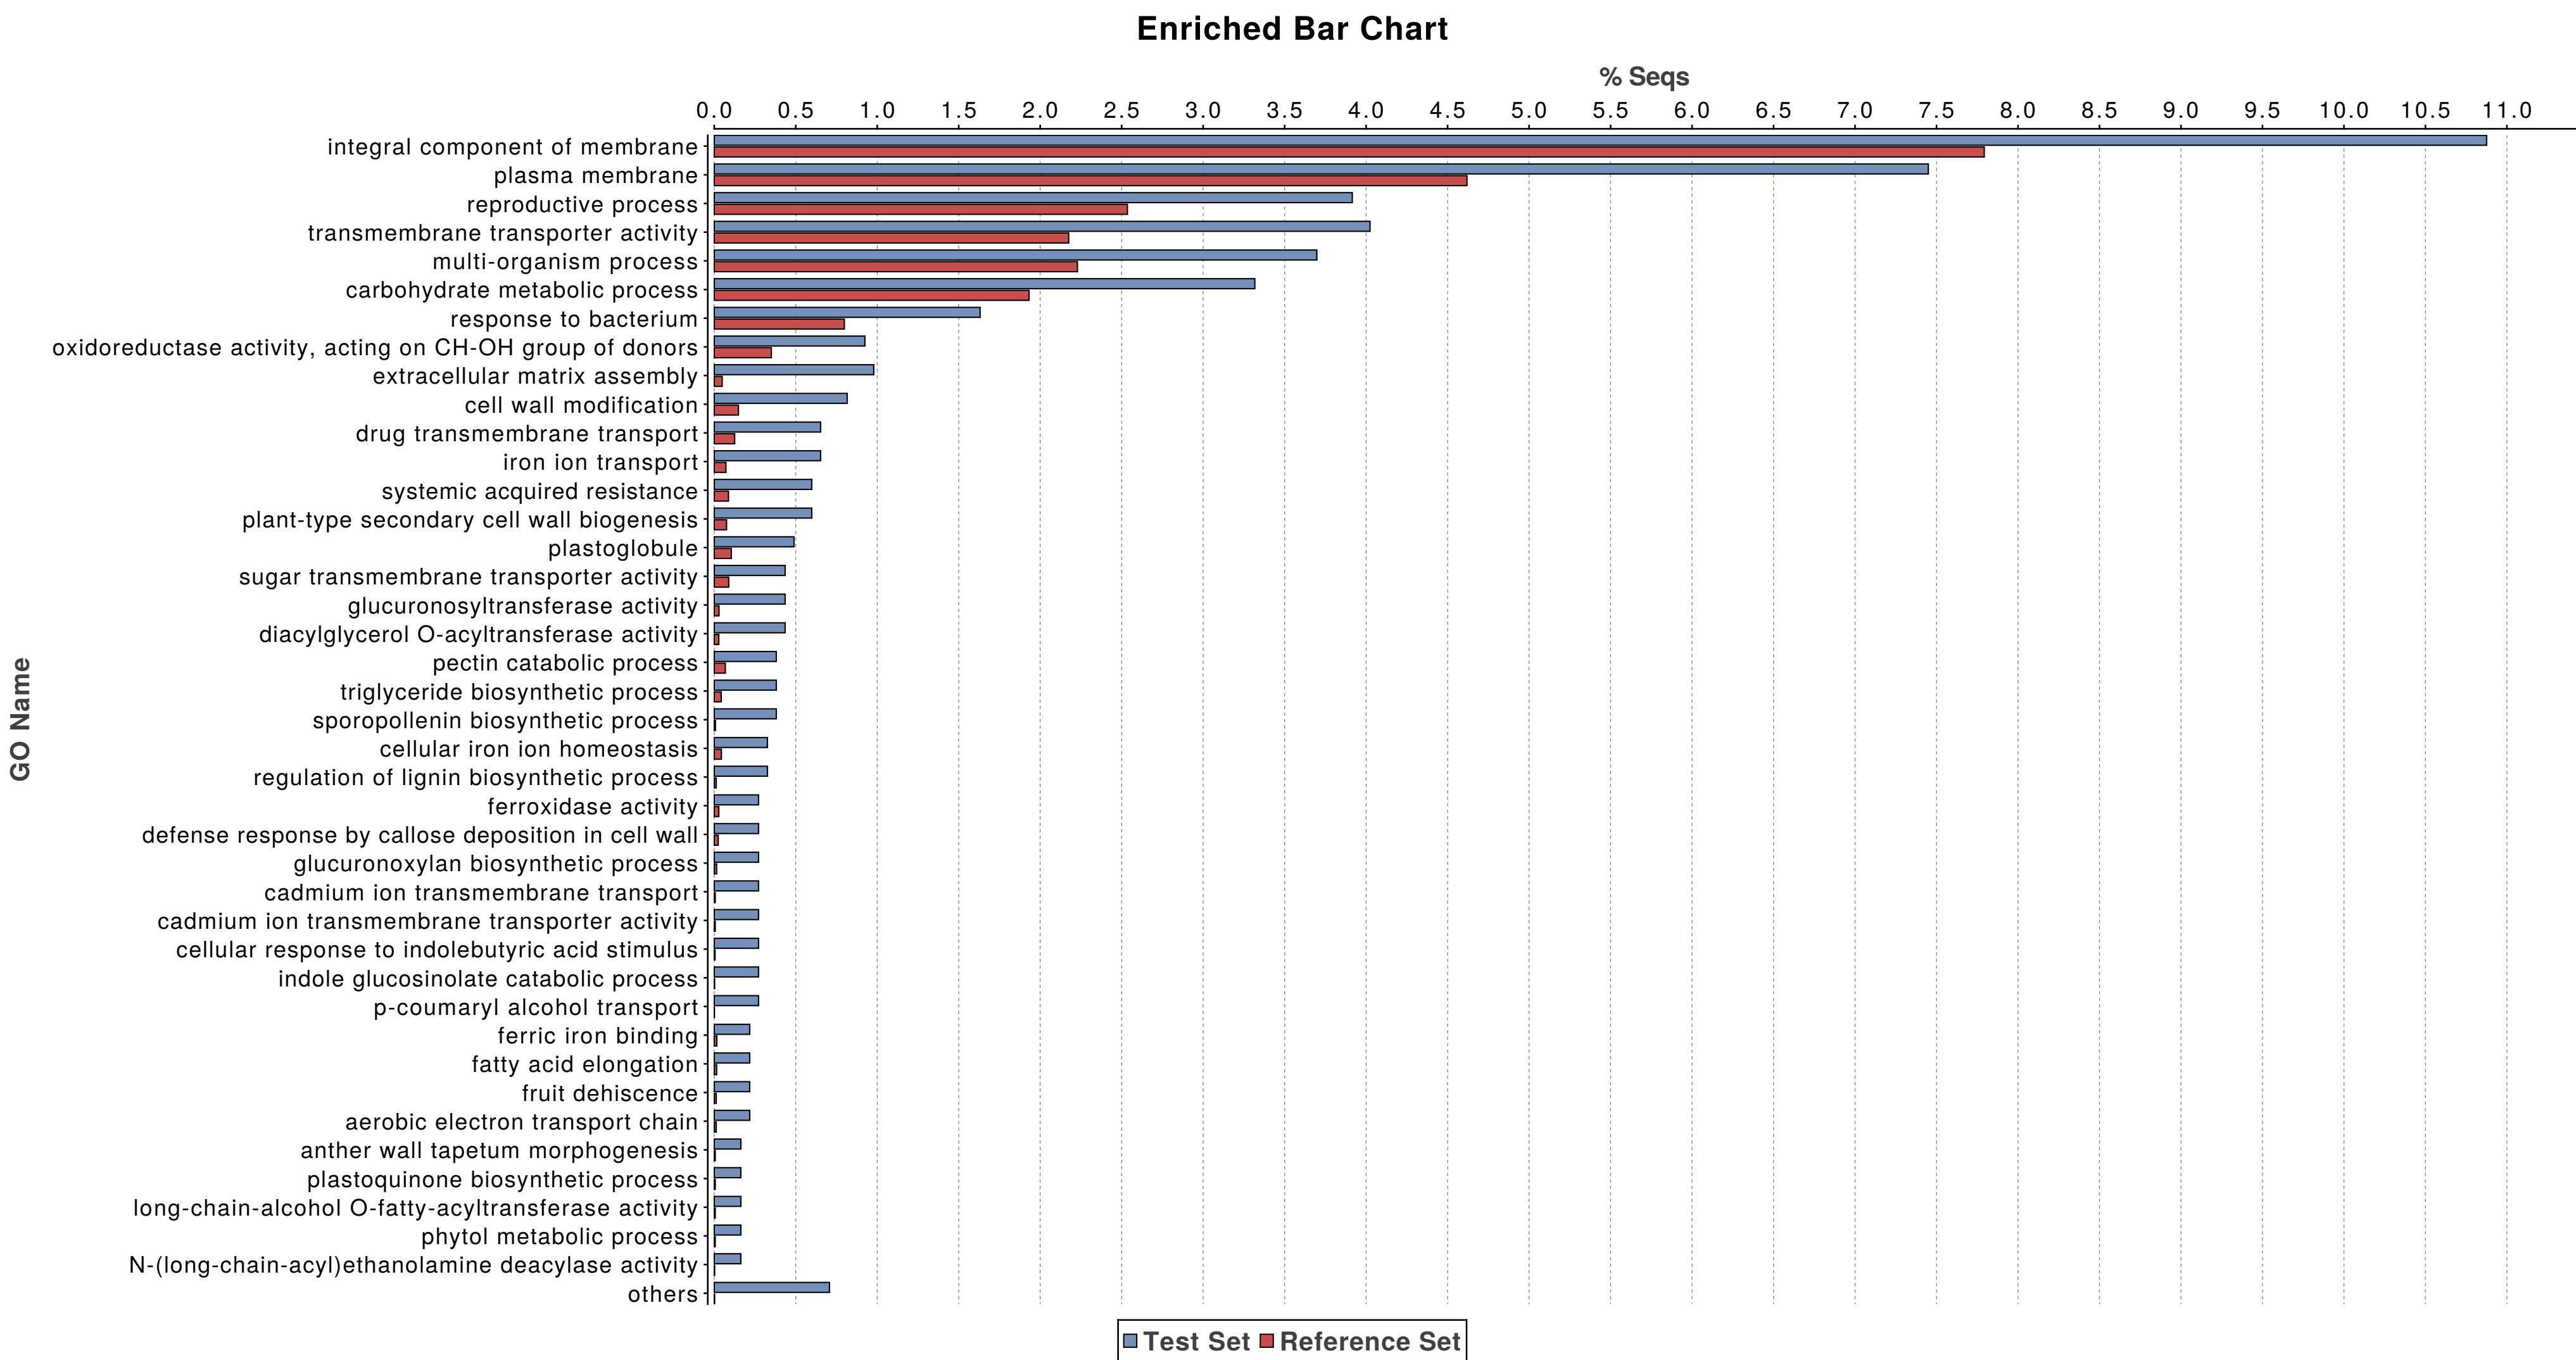

**Supplementary Figure 3.** The enriched GO categories downregulated in female flower buds of *Silene vulgaris*.

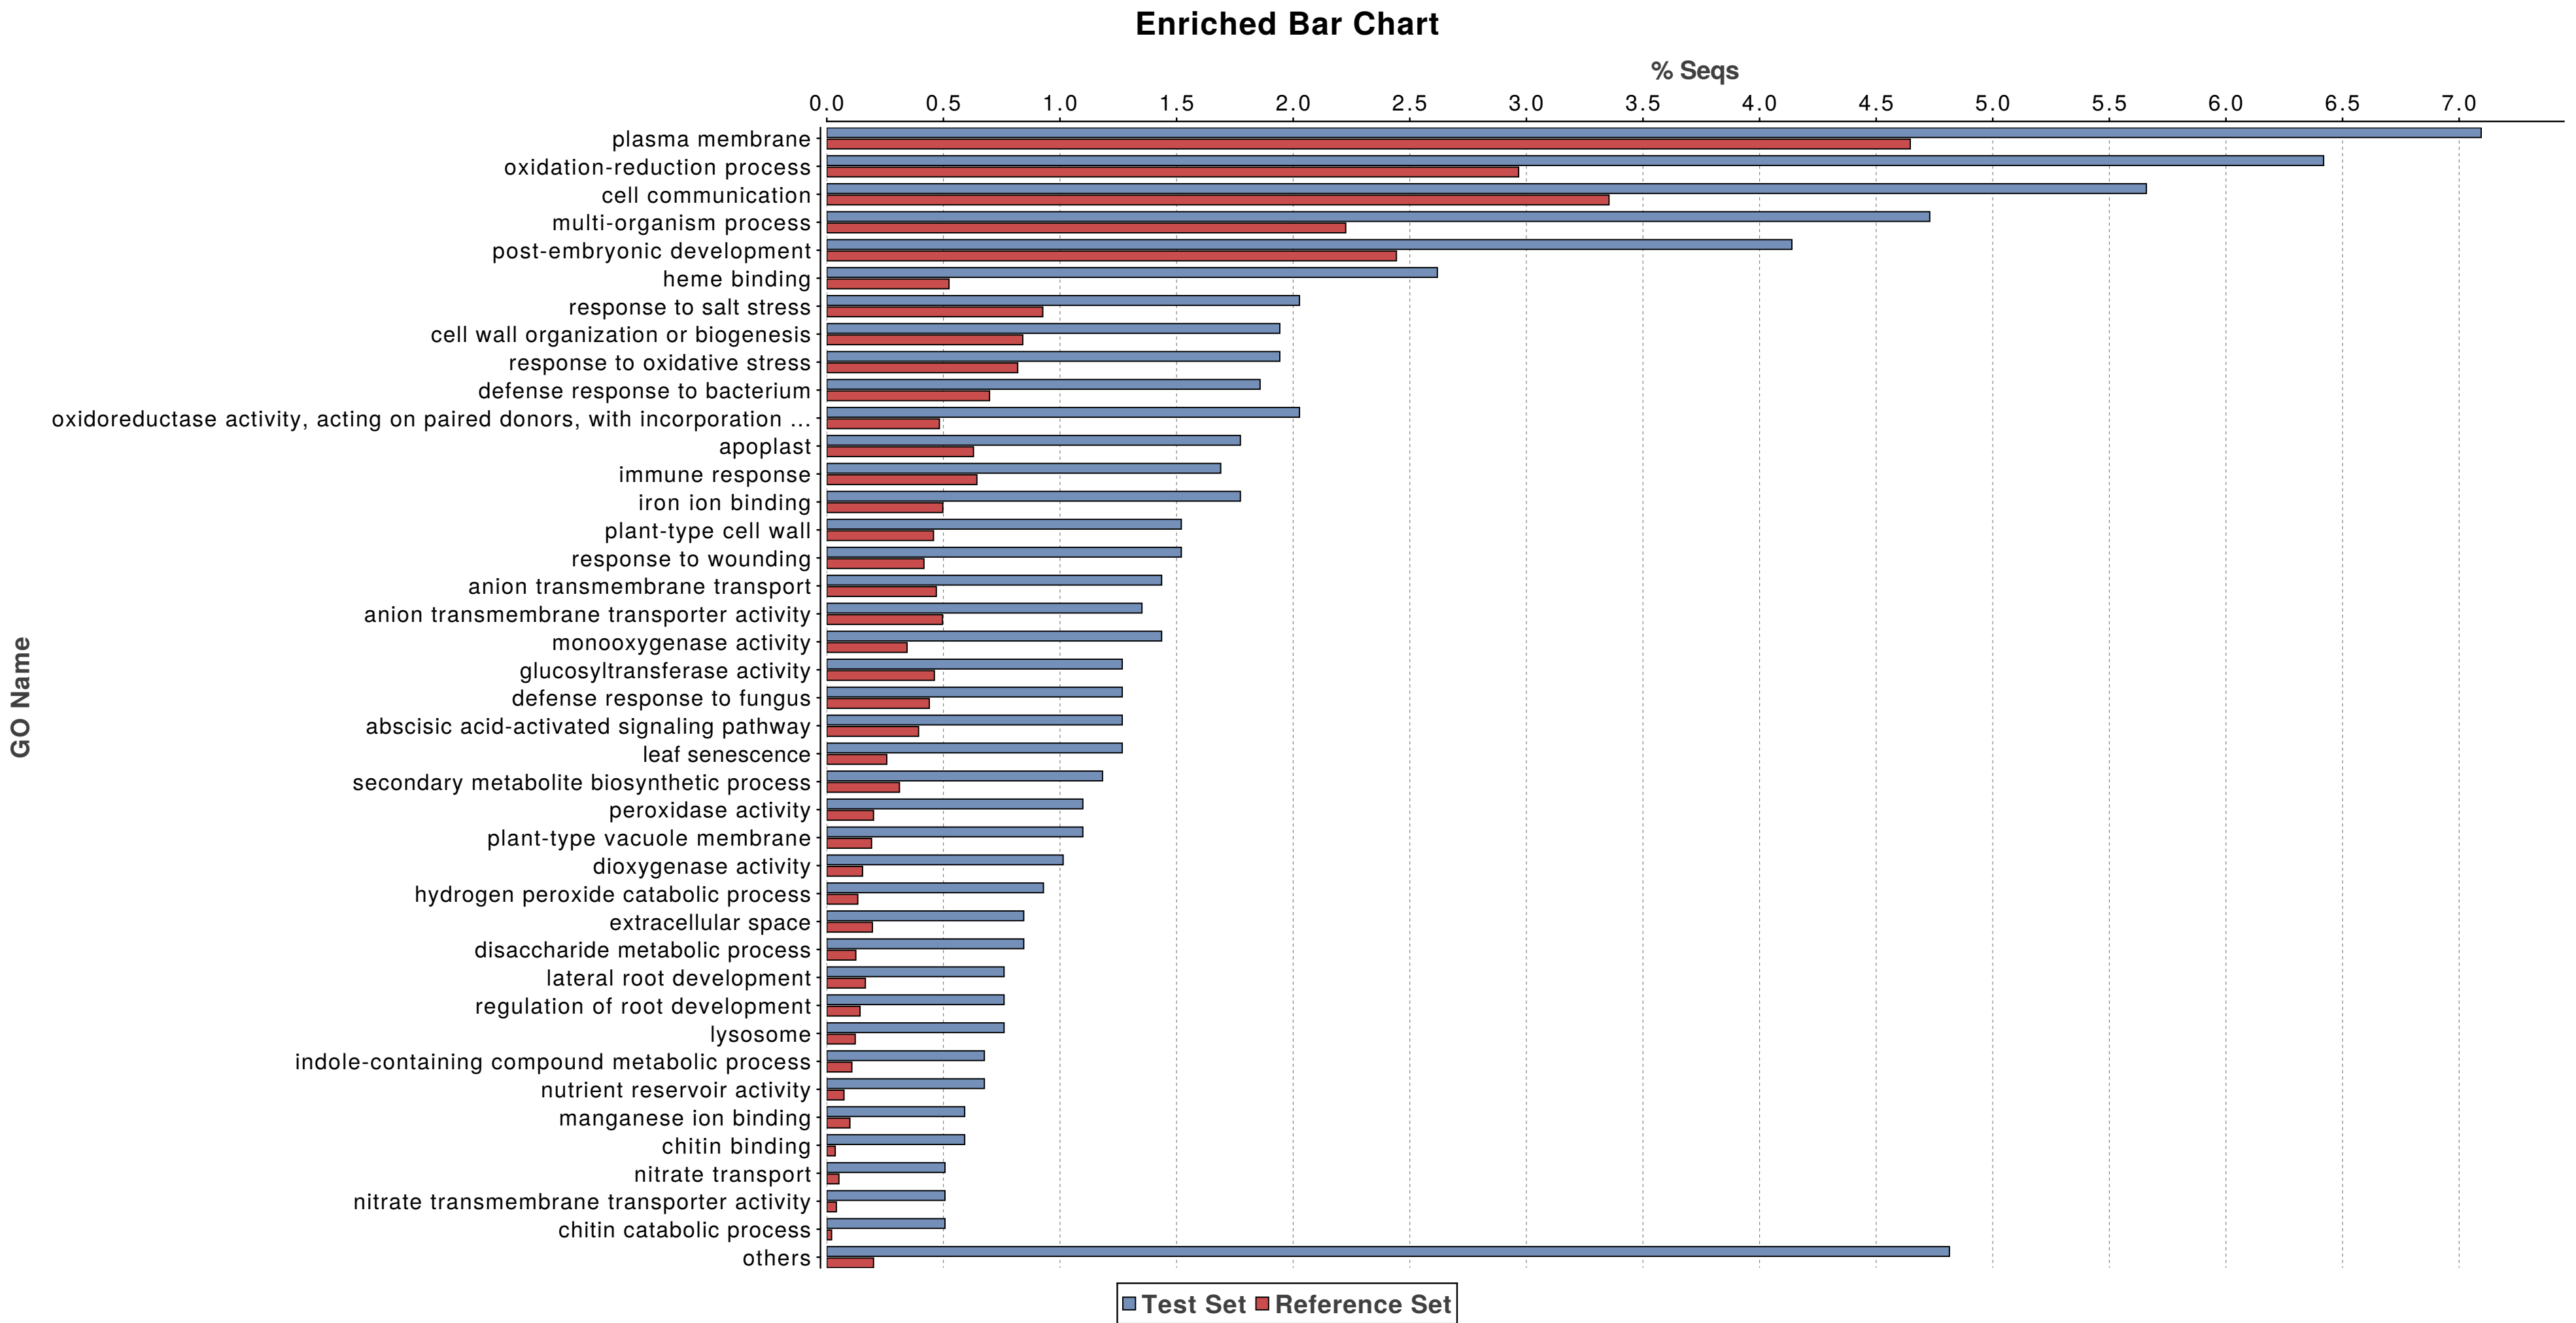

**Supplementary Figure 4.** The enriched GO categories upregulated in female flower buds of *Silene vulgaris*.

**Supplementary Table 1.** Primer sequences and PCR conditions used in this study.

| Primers used in RT qPCR |           |                          | Annealing temperature °C | Primer concentration $\mu$ M |
|-------------------------|-----------|--------------------------|--------------------------|------------------------------|
| Gene                    | Name      | Sequence                 |                          |                              |
| <i>SvAOX1</i>           | SvAOX1-F2 | TATGCCATGGGAGACGTACC     | 60                       | 0.4                          |
|                         | SvAOX1-R2 | GGCATCCATACCTCCTCTGG     |                          |                              |
| <i>SvPER</i>            | PER-F1    | CCTGGCCCTAGTTTCAACCTT    | 62                       | 0.4                          |
|                         | PER-R1    | GCGACCAATTGTATGTGCTCC    |                          |                              |
| <i>SvMC9</i>            | Meta-F1   | CCGAAACCAACAAATTGGATA    | 60                       | 0.4                          |
|                         | Meta-R1   | AGTTCAGGAAGGCGGAACCTTA   |                          |                              |
| <i>SvERF2</i>           | SvERF-F1  | GCGGCACTGACTTATGATCG     | 62                       | 0.4                          |
|                         | SvERF-R1  | TTCGGATTGGGTCAGGTTCA     |                          |                              |
| <i>SvGLP</i>            | GLPa-F1   | GTGGCTGAGCTCGCTATTCTA    | 60                       | 0.5                          |
|                         | GLpa-R1   | GACTTGAAAATGCGCGAGTGT    |                          |                              |
| <i>SvCAR4</i>           | C2DAR-F1  | TGCCCATTTCAGCTGACAGTTT   | 60                       | 0.4                          |
|                         | C2DAR-R1  | TGTCGACATGGTTGAACTCTTG   |                          |                              |
| <i>SvACO4</i>           | SvACO4-F1 | TGAGTTTCCCTGTGATTAGTTTGG | 62                       | 0.4                          |
|                         | SvACO4-R1 | TGTTAGCTTCTCCACCGTGTC    |                          |                              |
| <i>SvACT</i>            | SvACT-F   | GGGCTGTGATCTCTTTGCTC     | 60                       | 0.4                          |
|                         | SvACT-R   | ATTGTTCGGTATGGAAGCTC     |                          |                              |
